# Supplementary material
Source: ML conference proceedings conference paper supplement (https://aclanthology.org/P18-1252)
Supplement: Notes [file P18-1252.Notes.zip]

# 汉语依存句法树标注规范

An Annotation Guideline for Chinese Dependency-Grammar Tree

此规范还未正式发表。未经编者允许，请不要转发或传播。

参与编者：Anonymous

# 目 录

|          |                                                              |           |
|----------|--------------------------------------------------------------|-----------|
| <b>1</b> | <b>更新记录</b>                                                  | <b>6</b>  |
| 1.1      | 2018.1.20 . . . . .                                          | 6         |
| 1.2      | 2017.12.12 . . . . .                                         | 6         |
| 1.3      | 2017.11.27 . . . . .                                         | 6         |
| 1.4      | 2017.7.24 . . . . .                                          | 7         |
| 1.5      | 2017.7.17 . . . . .                                          | 8         |
| 1.6      | 2017.7.15 . . . . .                                          | 8         |
| 1.7      | 规范中文字颜色使用的说明 . . . . .                                       | 8         |
| <b>2</b> | <b>前言</b>                                                    | <b>8</b>  |
| 2.1      | 什么是依存句法树? . . . . .                                          | 8         |
| 2.2      | 投影树 vs. 非投影树 . . . . .                                       | 9         |
| 2.3      | 文章(篇章), 段落, 复句, 单句 . . . . .                                 | 10        |
| <b>3</b> | <b>标注技巧和说明</b>                                               | <b>12</b> |
| 3.1      | 利用已有的词典资源 . . . . .                                          | 12        |
| <b>4</b> | <b>依存关系类型汇总</b>                                              | <b>13</b> |
| <b>5</b> | <b>依存关系类型详解</b>                                              | <b>14</b> |
| 5.1      | root (sentence root, 根节点) . . . . .                          | 14        |
| 5.1.1    | 一般动词作谓语 . . . . .                                            | 14        |
| 5.1.2    | 动词“是”作谓语(类似的: “不是”、“就是”、“而是”、“全是”、“真是”、“还是”、“尤其是”) . . . . . | 14        |
| 5.1.3    | 动词“有”作谓语(类似的: “没有”) . . . . .                                | 14        |
| 5.1.4    | 形容词作谓语 . . . . .                                             | 14        |
| 5.1.5    | 名词作谓语 . . . . .                                              | 15        |
| 5.1.6    | 介词作谓语 . . . . .                                              | 15        |
| 5.1.7    | 主谓结构作谓语 . . . . .                                            | 15        |
| 5.1.8    | 短语: 无谓语 . . . . .                                            | 15        |
| 5.2      | sasubj-obj (same subject and object, 同主语同宾语) . . . . .       | 16        |
| 5.3      | sasubj (same subject, 同主语) . . . . .                         | 16        |
| 5.4      | dfsubj (different subject, 不同主语) . . . . .                   | 16        |
| 5.5      | subj (subject, 主语) . . . . .                                 | 17        |
| 5.5.1    | 主语是谓语的施事 . . . . .                                           | 17        |

|         |                                                                     |    |
|---------|---------------------------------------------------------------------|----|
| 5.5.2   | 主语是谓语的受事                                                            | 18 |
| 5.5.3   | 谓语是对主语的状态或其他情况的描述                                                   | 18 |
| 5.5.4   | 主语从句                                                                | 18 |
| 5.5.5   | “的”字结构作主语（核心词省略）                                                    | 18 |
| 5.5.6   | 形容词作主语                                                              | 18 |
| 5.5.7   | 不允许双主语（同一个谓语）                                                       | 20 |
| 5.5.8   | 主语后置，在谓语后面                                                          | 20 |
| 5.6     | subj-in (subject inside a subject-predicate predicate (主谓谓语中的内部主语)) | 21 |
| 5.7     | obj (object, 宾语)                                                    | 21 |
| 5.7.1   | 宾语是谓语的受事                                                            | 22 |
| 5.7.2   | “是”的宾语                                                              | 22 |
| 5.7.3   | 宾语从句                                                                | 22 |
| 5.7.4   | 宾语是谓语的施事                                                            | 23 |
| 5.7.5   | 宾语前置：在谓语的前面                                                         | 23 |
| 5.8     | pred (predicate, 谓语)                                                | 23 |
| 5.9     | att (attribute modifier, 定语)                                        | 24 |
| 5.9.1   | 名词、代词、形容词作定语：有“的”的情况                                                | 24 |
| 5.9.2   | 名词、代词、形容词作定语：没有“的”的情况                                               | 24 |
| 5.9.3   | 定语从句：有“的”的情况                                                        | 24 |
| 5.9.4   | 定语从句：没有“的”的情况                                                       | 25 |
| 5.9.5   | 核心词的各种情况                                                            | 25 |
| 5.9.6   | 副词作定语的情况                                                            | 26 |
| 5.9.7   | 介宾短语作定语的情况                                                          | 26 |
| 5.10    | adv (adverbial modifier, 状语)                                        | 26 |
| 5.10.1  | 形容词或副词作状语：有“地”的情况                                                   | 26 |
| 5.10.2  | 形容词或副词作状语：没有“地”的情况                                                  | 27 |
| 5.10.3  | 介宾短语作状语（宾语可能省略）                                                     | 27 |
| 5.10.4  | 动词作状语                                                               | 27 |
| 5.10.5  | 连词作状语                                                               | 27 |
| 5.10.6  | 时间词作状语                                                              | 28 |
| 5.10.7  | 名词作状语                                                               | 28 |
| 5.10.8  | 疑问词作状语                                                              | 28 |
| 5.10.9  | 数词作状语                                                               | 28 |
| 5.10.10 | 能愿动词作状语                                                             | 28 |

|                                                    |           |
|----------------------------------------------------|-----------|
| 5.10.11 助词“是”作状语 . . . . .                         | 29        |
| 5.10.12 副词“有/没有”作状语 . . . . .                      | 29        |
| 5.10.13 状语修饰介宾短语 . . . . .                         | 30        |
| 5.10.14 状语修饰名词 . . . . .                           | 30        |
| 5.11 cmp (complement modifier, 补语) . . . . .       | 30        |
| 5.11.1 动词作补语 . . . . .                             | 30        |
| 5.11.2 形容词或副词作补语: 有“得”的情况 . . . . .                | 31        |
| 5.11.3 形容词或副词作补语: 没有“得”的情况 . . . . .               | 31        |
| 5.11.4 介宾短语作补语 . . . . .                           | 31        |
| 5.11.5 “数词 + 量词”作补语 . . . . .                      | 32        |
| 5.11.6 名词作补语 . . . . .                             | 32        |
| 5.11.7 比拟助词“似的/一般/一样”作补语 . . . . .                 | 32        |
| 5.11.8 副词“没有/没”作补语 . . . . .                       | 32        |
| 5.12 coo (coordination construction, 并列) . . . . . | 33        |
| 5.12.1 名词或代词并列 . . . . .                           | 33        |
| 5.12.2 形容词并列, 作定语 . . . . .                        | 33        |
| 5.12.3 副词并列, 作状语 . . . . .                         | 34        |
| 5.12.4 能愿动词并列, 作状语 . . . . .                       | 34        |
| 5.12.5 介宾短语并列 (及第一个介词省略的情况) . . . . .              | 34        |
| 5.13 pobj (preposition object, 介宾) . . . . .       | 35        |
| 5.14 iobj (indirect-object, 间宾) . . . . .          | 35        |
| 5.15 de (de-construction, “的”字结构) . . . . .        | 36        |
| 5.16 adjct (adjunct, 附加成分) . . . . .               | 36        |
| 5.17 app (appellation, 称呼) . . . . .               | 37        |
| 5.18 exp (explanation, 进一步解释) . . . . .            | 37        |
| 5.18.1 用括号中的内容进一步解释 . . . . .                      | 37        |
| 5.18.2 “冒号或逗号等标点 + 解释” . . . . .                   | 37        |
| 5.19 punc (punctuation, 标点) . . . . .              | 39        |
| 5.20 frag (fragment, 片段) . . . . .                 | 39        |
| <b>6 分词粒度对句法标注的影响</b>                              | <b>39</b> |
| <b>7 难点分析: 容易混淆的点</b>                              | <b>40</b> |
| 7.1 动词 vs. 介词 . . . . .                            | 40        |
| 7.1.1 区分动词和介词的一般原则 . . . . .                       | 40        |
| 7.1.2 区分动词和介词的另一个考虑因素 . . . . .                    | 42        |

|        |                                                                                 |    |
|--------|---------------------------------------------------------------------------------|----|
| 7.2    | 复合名词短语“W <sub>1</sub> W <sub>2</sub> W <sub>3</sub> ”内部结构的标注                    | 42 |
| 7.3    | 动词 vs. 名词（尤其是在复合名词短语内部）                                                         | 44 |
| 7.4    | sasubj-obj/sasubj/dfsubj 嵌套结构的标注                                                | 44 |
| 7.5    | “数词 + 量词”作定语（修饰后面的名词）vs. 作补语（修饰前面的动词）                                           | 46 |
| 7.6    | “数词 + 量词”作谓语 vs. 作名词短语的核心词                                                      | 46 |
| 7.7    | “的” vs. “得”（一字之差）                                                               | 46 |
| 7.8    | 同主语 vs. 前一个动词作后一个动词的状语                                                          | 46 |
| 7.9    | 同主语 vs. 宾语从句                                                                    | 47 |
| 7.10   | 同主语 vs. 主语从句                                                                    | 47 |
| 7.11   | 主语从句 vs. 补语                                                                     | 47 |
| 7.12   | 补语 vs. 附加                                                                       | 48 |
| 7.13   | 多个形容词（或副词）并列后修饰核心词 vs. 分别修饰核心词                                                  | 48 |
| 7.14   | “N <sub>1</sub> +N <sub>2</sub> + 谓语”：(subj+subj-in) vs. (att+subj)             | 48 |
| 7.15   | “N <sub>1</sub> +N <sub>2</sub> + 谓语”：N <sub>1</sub> 作定语 vs. N <sub>1</sub> 作状语 | 49 |
| 7.16   | 多个定语：其中一个是定语从句                                                                  | 49 |
| 7.17   | 叠词                                                                              | 50 |
| 7.18   | “V <sub>1</sub> ...V <sub>2</sub> ... 附加成分”                                     | 50 |
| 7.19   | “倒装”                                                                            | 50 |
| 7.20   | “是”字句分析                                                                         | 51 |
| 7.20.1 | 动词“是”作谓语：一般情况                                                                   | 51 |
| 7.20.2 | 动词“是”作谓语：“是... 的”结构或“的... 是”结构                                                  | 51 |
| 7.20.3 | 动词“是”作谓语：“是”+ 宾语从句的结构                                                           | 52 |
| 7.20.4 | 助词“是”作状语                                                                        | 52 |
| 7.20.5 | 副词“是”作状语                                                                        | 52 |
| 7.20.6 | 副词“是”作定语                                                                        | 52 |
| 7.20.7 | 连词“是”作状语                                                                        | 52 |
| 7.21   | “有”字句分析                                                                         | 53 |
| 7.21.1 | 动词“有”作谓语：一般情况                                                                   | 53 |
| 7.21.2 | 动词“有”作谓语：“有...N...V”兼语结构                                                        | 53 |
| 7.21.3 | 动词“有”作谓语：“有...N...V”的结构                                                         | 53 |
| 7.21.4 | 形容词“有”作定语                                                                       | 53 |
| 7.21.5 | 副词“有”作状语                                                                        | 55 |
| 7.22   | “来”字句分析                                                                         | 55 |
| 7.22.1 | 动词“来”作谓语                                                                        | 55 |
| 7.22.2 | 代词“来”作定语                                                                        | 55 |

|                                |           |
|--------------------------------|-----------|
| 7.22.3 助词“来”作定语 . . . . .      | 55        |
| 7.22.4 助词“来”作状语 . . . . .      | 55        |
| 7.22.5 “来”作补语 . . . . .        | 55        |
| 7.22.6 助词“来”作附加 . . . . .      | 56        |
| 7.22.7 “来”作核心词 . . . . .       | 56        |
| 7.23 “去”字句分析 . . . . .         | 56        |
| 7.23.1 动词“去”作谓语 . . . . .      | 56        |
| 7.23.2 “去”作补语 . . . . .        | 56        |
| 7.23.3 “去”作附加 . . . . .        | 56        |
| 7.24 “给”字句分析 . . . . .         | 58        |
| 7.24.1 动词“给”作谓语 . . . . .      | 58        |
| 7.24.2 介词“给”构成介宾短语 . . . . .   | 58        |
| 7.25 “到”字句分析 . . . . .         | 58        |
| 7.25.1 动词“到”构成动宾短语 . . . . .   | 58        |
| 7.25.2 介词“到”构成介宾短语 . . . . .   | 58        |
| 7.25.3 助词“到”作为补语 . . . . .     | 58        |
| 7.26 “不管”作连词 vs. 作动词 . . . . . | 60        |
| 7.27 句子内部停顿的分析 . . . . .       | 60        |
| 7.28 “与事主语”和“工具主语”分析 . . . . . | 60        |
| <b>8 致谢（姓名列表不完整，会陆续补充）</b>     | <b>61</b> |

## 4 依存关系类型汇总

本规范目前规定了 20 种依存关系类型，我们把关系类型标签分为三大类：

- 谓语对应的依存关系标签：root, sasubj-obj, sasubj, dfsubj。此类标签都是右弧；
- 单句内部主干关系标签：subj, subj-in, obj, att, adv, cmp；
- 单句内部其他关系标签：coo, pobj, iobj, de, adjunct, app, exp, punc, frag。

如表3所示。

| 关系标签       | 说明                                                           | 例句            | 标注结果                                                           |
|------------|--------------------------------------------------------------|---------------|----------------------------------------------------------------|
| root       | sentence root (根节点)                                          | 我 爱 妈妈        | \$ $\xrightarrow{\text{root}}$ 爱                               |
| sasubj-obj | same subject and object (同主语同宾语)                             | 表1例 (c)       | 研究 $\xrightarrow{\text{sasubj-obj}}$ 思考                        |
| sasubj     | same subject (同主语)                                           | 表1例 (d)       | 走进 $\xrightarrow{\text{sasubj}}$ 打                             |
| dfsubj     | different subject (不同主语)                                     | 表2例 (B)       | 喜欢 $\xrightarrow{\text{dfsubj}}$ 讨厌                            |
| subj       | subject (主语)                                                 | 我 爱 妈妈        | 我 $\xleftarrow{\text{subj}}$ 爱                                 |
| subj-in    | subject inside a subject-predicate predicate<br>(主谓谓语中的内部主语) | 他 确实 头 疼      | 头 $\xleftarrow{\text{subj-in}}$ 疼                              |
| obj        | object (宾语)                                                  | 我 爱 妈妈        | 爱 $\xrightarrow{\text{obj}}$ 妈妈                                |
| pred       | predicate (谓语)                                               | 命令 他 扫地       | 他 $\xrightarrow{\text{pred}}$ 扫地                               |
| att        | attribute modifier (定语)                                      | 国家 主席         | 国家 $\xleftarrow{\text{att}}$ 主席                                |
| adv        | adverbial modifier (状语)                                      | 非常 喜欢         | 非常 $\xleftarrow{\text{adv}}$ 喜欢                                |
| cmp        | complement modifier (补语)                                     | 洗 干净 手        | 洗 $\xrightarrow{\text{cmp}}$ 干净                                |
| coo        | coordination construction (并列结构)                             | 鲜花 和 掌声       | 鲜花 $\xrightarrow{\text{coo}}$ 掌声                               |
| pobj       | preposition object (介宾)                                      | 在 家 看书        | 在 $\xrightarrow{\text{pobj}}$ 家                                |
| iobj       | indirect-object (间宾)                                         | 给 他 书         | 给 $\xrightarrow{\text{iobj}}$ 他                                |
| de         | de-construction (“的”字结构)                                     | 这是 他的         | 他 $\xleftarrow{\text{de}}$ 的                                   |
| adjct      | adjunct (附加成分)                                               | 我 走了          | 走 $\xrightarrow{\text{adjct}}$ 了                               |
| app        | appellation (称呼)                                             | 老师， 你好        | 老师 $\xleftarrow{\text{app}}$ 好                                 |
| exp        | explanation (进一步解释)                                          | 普京 ( 俄罗斯 总统 ) | 普京 $\xrightarrow{\text{exp}}$ 总统                               |
| punc       | punctuation (标点)                                             | 我 爱 妈妈。       | 爱 $\xrightarrow{\text{punc}}$ 。                                |
| frag       | fragment (片段)                                                | 你， 我， 中国。     | 你 $\xrightarrow{\text{frag}}$ 我 $\xrightarrow{\text{frag}}$ 中国 |

表 3: 依存关系类型汇总表
